# Supplementary material for: Luminescence-colour-changing sensing toward neurological drug carbamazepine in water and biofluids based on white light-emitting CD/Ln-MOF/PVA test papers
Source: Royal Society of Chemistry journal article supplement (doi:10.1039/d1tc02042k), 2021-01-01
Supplement: d1tc02042k1.pdf [file d1tc02042k1.pdf]

## Electronic Supporting Information

### Luminescence-Colour-Changing Sensing Toward Neurological Drug Carbamazepine in Water and Biofluids Based on a White- Light-Emitting CD/Ln-MOF/PVA Test Paper

*Yuxin Li, Mingao Sun, Yang Yang, Hong Meng, Qiaoe Wang, Chensha Li, Guangming Li*

**Table S1.** Ratio of lanthanide ions by ICP for MOF-76(Eu<sub>x</sub>Tb<sub>1-x</sub>)/PVA.

| Material                                           | Weight ratio (%) |    | Measured ratio (%) |       |
|----------------------------------------------------|------------------|----|--------------------|-------|
|                                                    | Eu               | Tb | Eu                 | Tb    |
| MOF-76(Eu <sub>0.01</sub> Tb <sub>0.99</sub> )/PVA | 1                | 99 | 0.97               | 99.03 |
| MOF-76(Eu <sub>0.03</sub> Tb <sub>0.97</sub> )/PVA | 3                | 97 | 2.95               | 97.05 |
| MOF-76(Eu <sub>0.05</sub> Tb <sub>0.95</sub> )/PVA | 5                | 95 | 4.88               | 95.12 |
| MOF-76(Eu <sub>0.07</sub> Tb <sub>0.93</sub> )/PVA | 7                | 93 | 6.92               | 93.08 |
| MOF-76(Eu <sub>0.09</sub> Tb <sub>0.91</sub> )/PVA | 9                | 91 | 8.87               | 91.13 |

**Table S2.** Elemental analysis of C, H, O, N atoms for mCD/MOF-76(Eu<sub>0.05</sub>Tb<sub>0.95</sub>)/PVA.

| Material                                              | Weight ratio | C (%) | H (%) | O (%) | N (%) |
|-------------------------------------------------------|--------------|-------|-------|-------|-------|
|                                                       |              |       |       |       |       |
| CD:MOF-76(Eu <sub>0.05</sub> Tb <sub>0.95</sub> )/PVA | 6:994        | 50.92 | 4.75  | 43.75 | 0.58  |
| CD:MOF-76(Eu <sub>0.05</sub> Tb <sub>0.95</sub> )/PVA | 12:988       | 51.35 | 4.91  | 42.60 | 1.14  |
| CD:MOF-76(Eu <sub>0.05</sub> Tb <sub>0.95</sub> )/PVA | 18:982       | 51.58 | 4.87  | 41.86 | 1.69  |
| CD:MOF-76(Eu <sub>0.05</sub> Tb <sub>0.95</sub> )/PVA | 24:976       | 51.73 | 4.84  | 41.12 | 2.31  |
| CD:MOF-76(Eu <sub>0.05</sub> Tb <sub>0.95</sub> )/PVA | 30:970       | 51.79 | 4.78  | 40.46 | 2.97  |

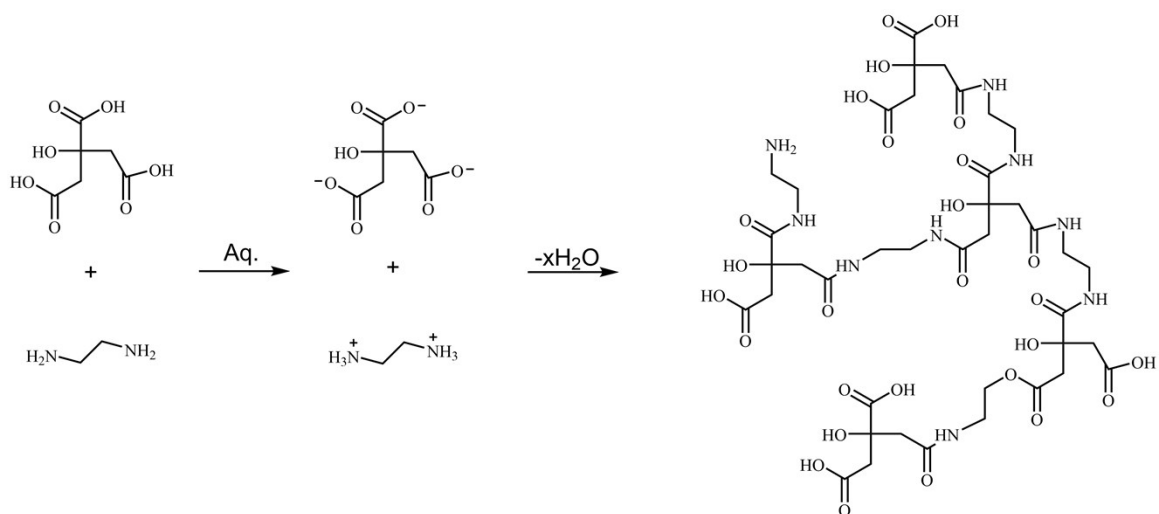

**Scheme S1.** A synthetic route using citric acid and ethylenediamine: from ionization to condensation and polymerization.

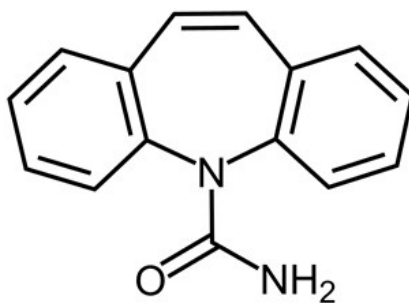

**Figure S1.** The molecule formula of CBZ molecule.

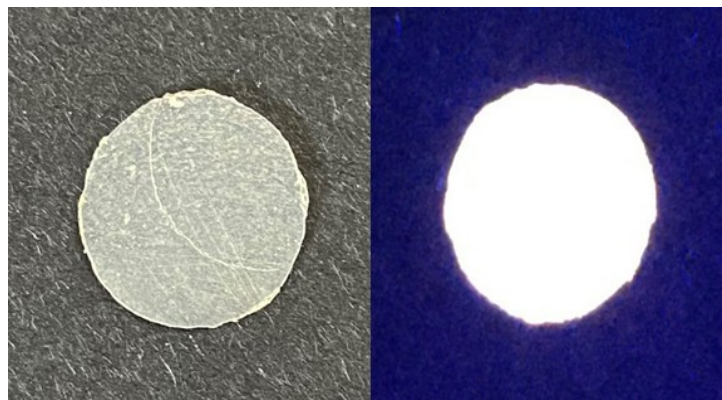

**Figure S2.** Photo images under daylight (left) and a UV lamp (right).

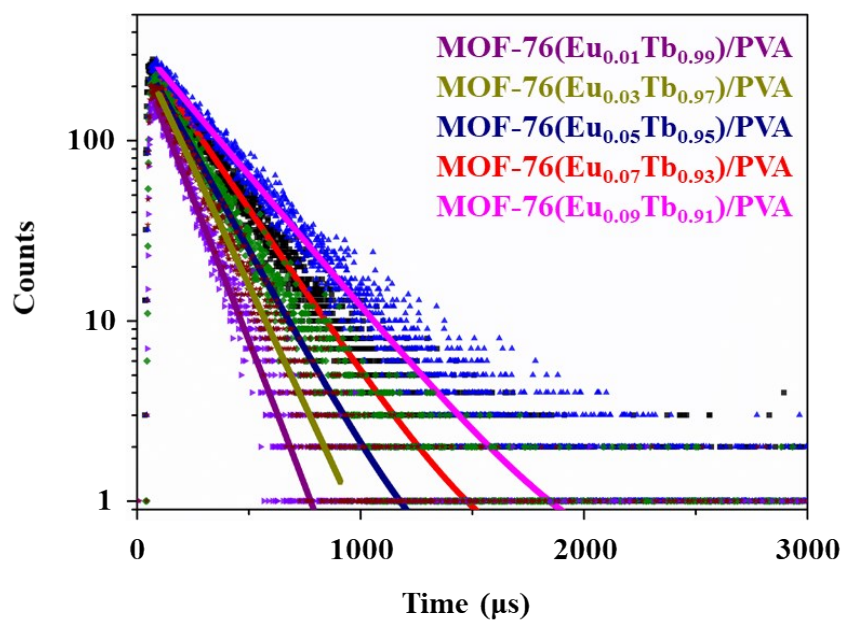

**Figure S3.** Time-dependent decaying curves of MOF-76(Eu<sub>x</sub>Tb<sub>1-x</sub>)/PVA under 614 nm.

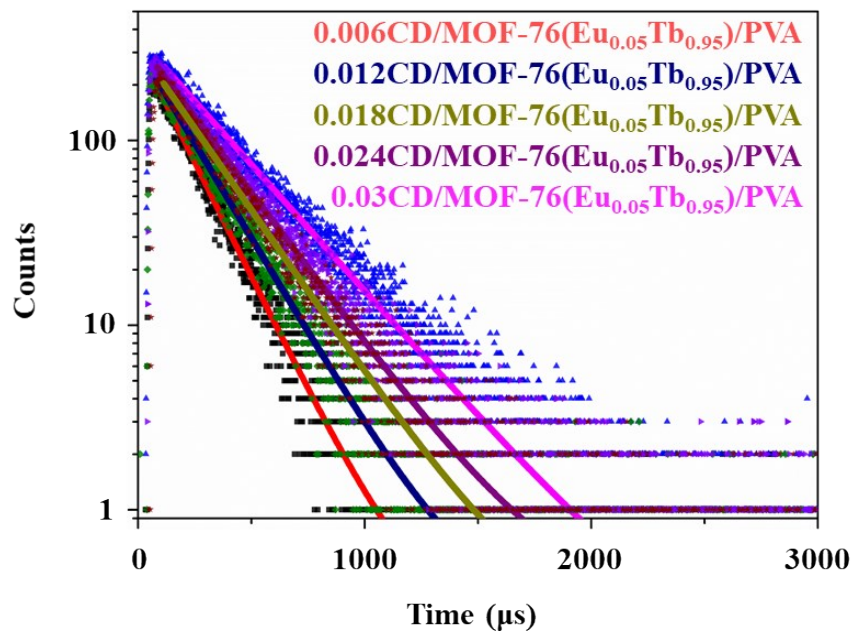

Figure S4. Decay curves of mCD/MOF-76(Eu<sub>0.05</sub>Tb<sub>0.95</sub>)/PVA under 614 nm.

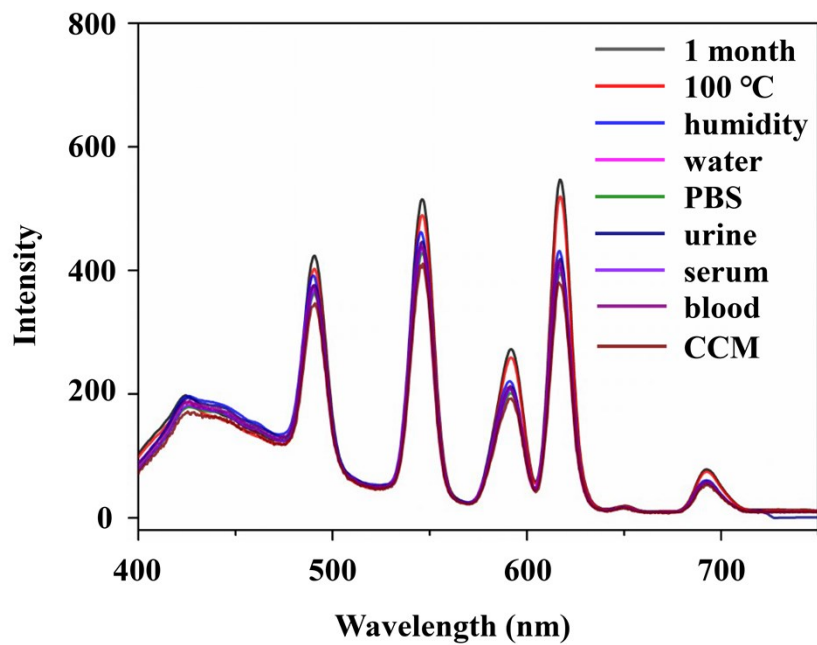

Figure S5. Emission spectra of WLE-TP under 9 kinds of solutions.

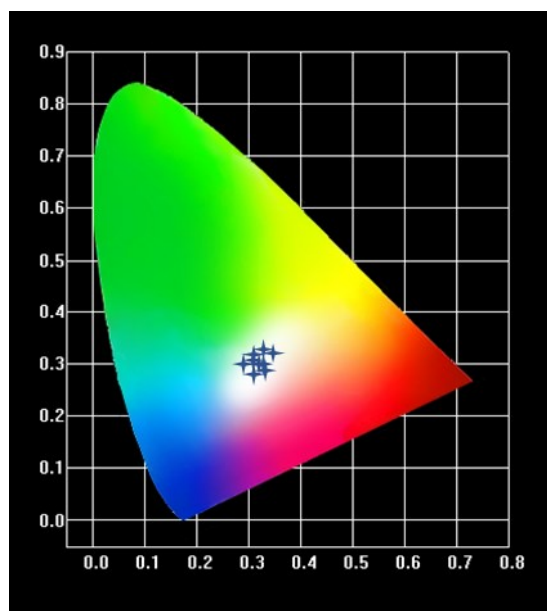

**Figure S6.** CIE of WLE-TP under 9 kinds of solutions.

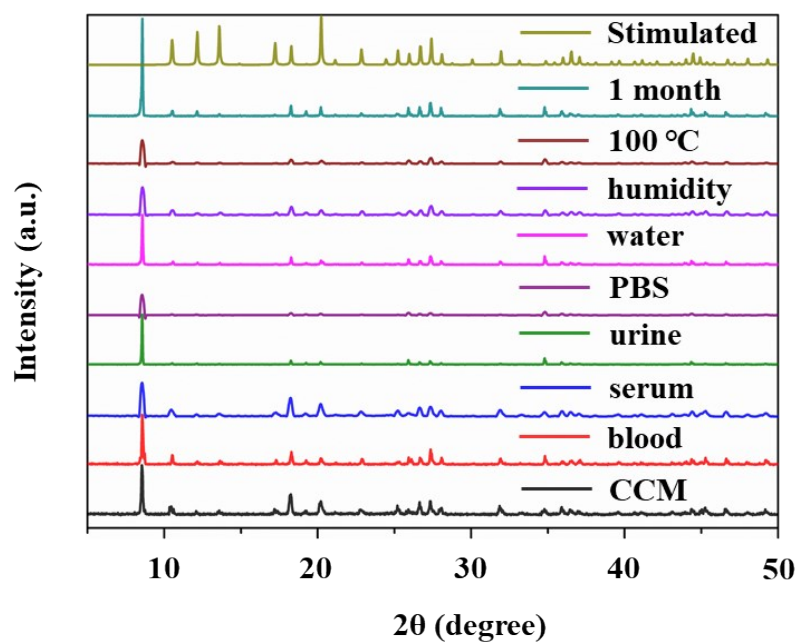

**Figure S7.** PXRD patterns of WLE-TP after soaking and drying in nine solutions.

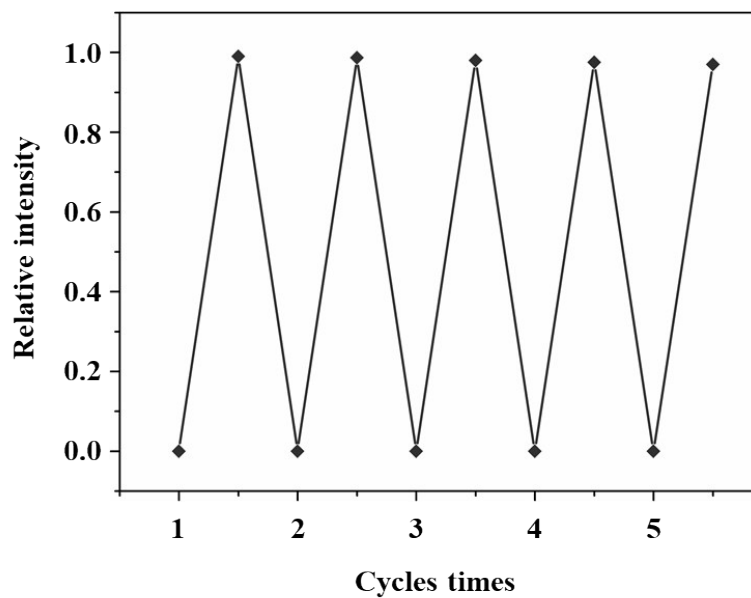

**Figure S8.** Recyclability tests of WLE-TP implemented with CBZ solution.

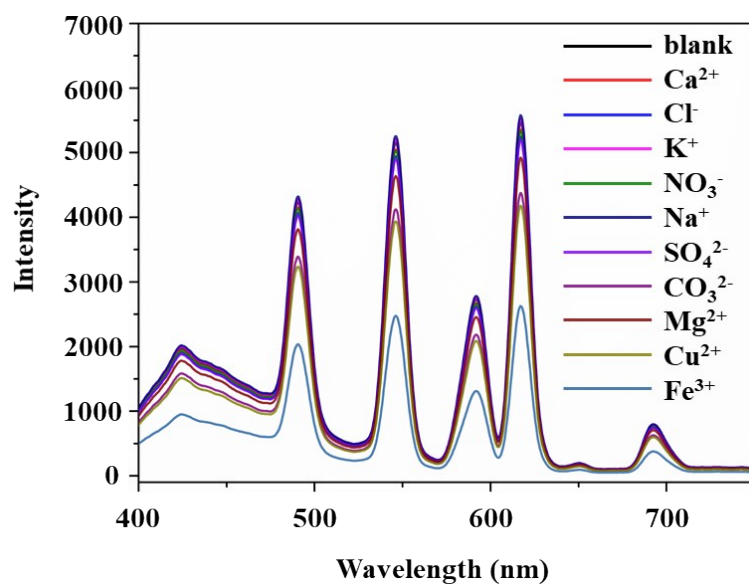

**Figure S9.** Selective fluorescence detection of inorganic ions in water by WLE-TP.

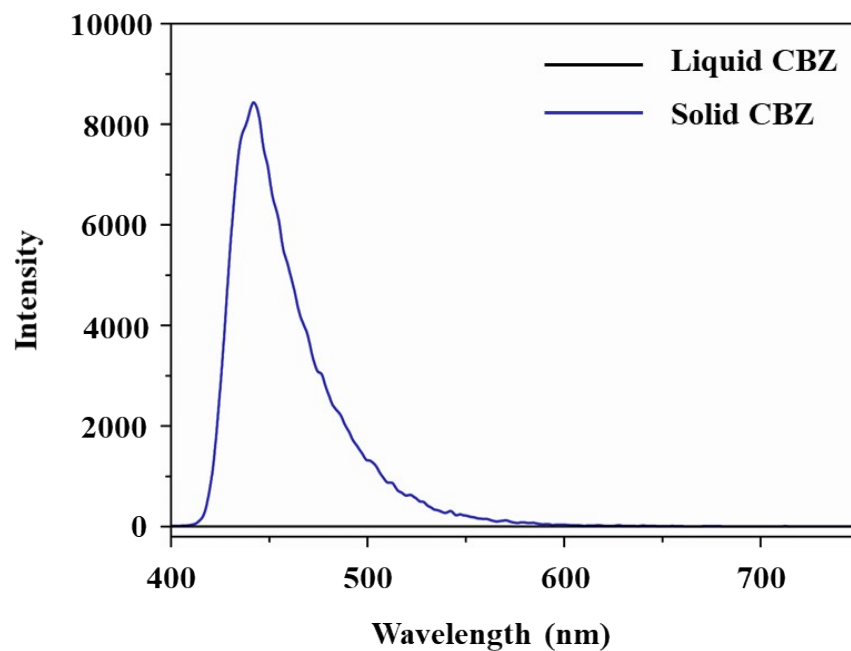

**Figure S10.** Emission spectrum of CBZ.

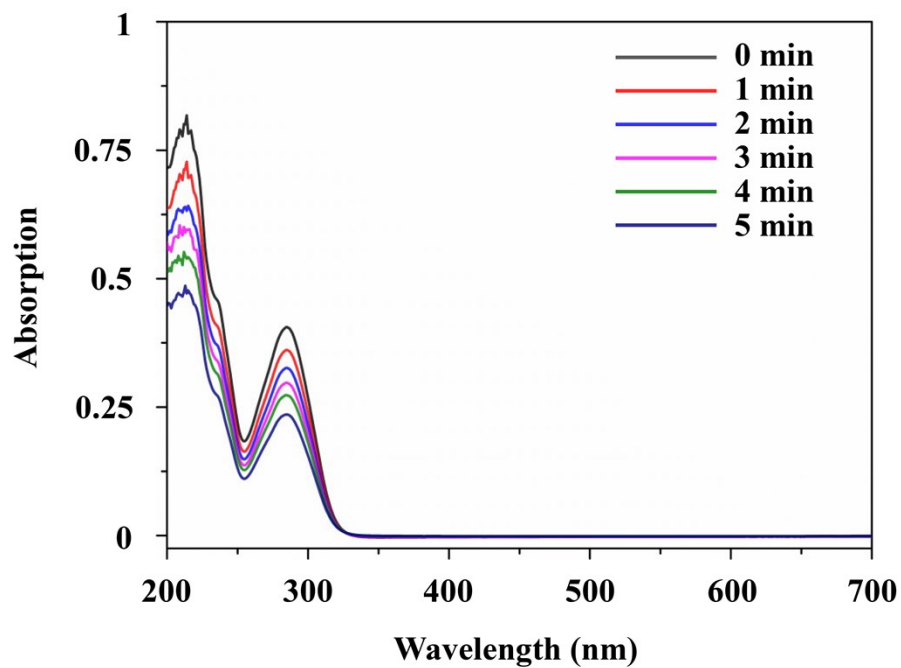

**Figure S11.** UV-vis spectra of 1mM CBZ solution immersed in WLE-TP for different times.

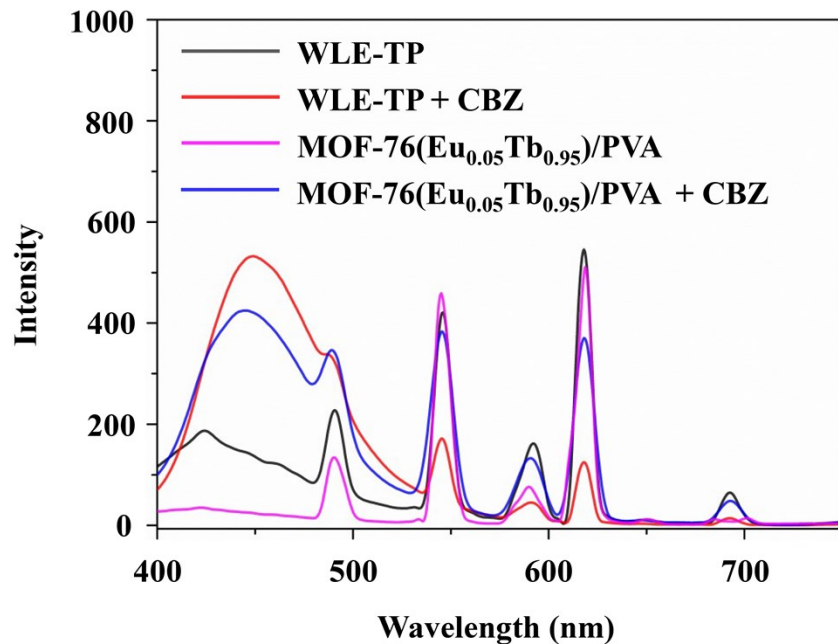

**Figure S12.** Fluorescence spectra of WLE-TP and MOF-76(Eu<sub>0.05</sub>Tb<sub>0.95</sub>)/PVA after immersion in 1 mM CBZ solution.
